# Supplementary material for: The design and synthesis of redox-responsive oridonin polymeric prodrug micelle formulation for effective gastric cancer therapy
Source: Royal Society of Chemistry journal article supplement (doi:10.1039/d1tb00127b), 2021-01-01
Supplement: d1tb00127b1.pdf [file d1tb00127b1.pdf]

**Supporting Information**

**The design and synthesis redox-responsive oridonin polymeric prodrug micelle  
formulation for effective gastric cancer therapy**

Luzhou Xu<sup>1</sup>, Lei Zhu<sup>1</sup>, Kai Zheng<sup>1</sup>, Junlou Liu<sup>2</sup>, PanpanTian<sup>3</sup>, Di hu<sup>2</sup>, Qianqian Wang<sup>2</sup>,  
Qiaoyun Zuo<sup>2</sup>, Xiaosong Ouyang<sup>2</sup>, Yanna Dai<sup>2</sup>, Yuxian Fu<sup>2</sup>, Xinyi Dai<sup>2</sup>, Fang Huang<sup>4\*</sup>, Jun  
Cheng<sup>5,6\*</sup>

1. Gastroenterology Department, Affiliated hospital of Nanjing university of Chinese  
Medicine, Nanjing, China, 210029.

2. The First Clinical Medical College of Nanjing University of Chinese Medicine,  
Nanjing, China, 210023

3. Internal Medicine Department, Affiliated hospital of Nanjing university of Chinese  
Medicine, Nanjing, China, 210029.

4. School of Traditional Chinese Medicine, China Pharmaceutical University, Nanjing,  
China, 211199

5. Jiangsu Hongdian Research Institute of Traditional Chinese Medicine Industry,  
Nanjing, China, 210042.

6. Nanjing Zhongshan Pharmaceutical Co. LTD, Nanjing, China, 210046.

**\*Correspondence Author:**

**1.** Jun Cheng, Jiangsu. **Address:** 1) Hongdian Research Institute of Traditional Chinese  
Medicine Industry, Nanjing, China, 210000; 2) Nanjing Zhongshan Pharmaceutical Co.  
LTD, Nanjing, China, 210042. **Email:** cj9119@sina.com

23 **2.** Fang Huang. **Address:** School of Traditional Chinese Medicine, China

24 Pharmaceutical University, Nanjing, China, 211198. **Email:** [chengtianle007@163.com](mailto:chengtianle007@163.com)

25

26

27

28

29

30

31

32

33

34

35

36

37

38

39

40

41

42

43

44

## 45 **Experimental section**

### 46 **Materials**

47 ORI, and 3,3'-dithiodipropionic acid (DTPA) were purchased from Aldrich, and the  
48 3,3'-dithiodipropionic acid anhydride (DTPAA) was prepared according to a previous  
49 report.<sup>[1]</sup> *N*<sup>ε</sup>-benzyloxycarbonyl-lysine-N-carboxyanhydride (Lys(Z)-NCA) was obtained  
50 from JINJINLE CHEMICAL CO., LTD (Shanghai, China) and was used as received.  
51 Methoxy polyethylene glycol functionalized amine (PEG-NH<sub>2</sub>, molecular weight [MW]:  
52 5000 Da) was obtained from Aladdin (Shanghai, China) and dehydrated by azeotrope  
53 with toluene. Dry *N,N*-dimethylformamide was obtained from Energy Chemical  
54 (Shanghai, China). Coumarin-6 was obtained from J&K Scientific Ltd. (Shanghai, China).  
55 2-(4-Amidinophenyl)-6-indolecarbamidine dihydrochloride (DAPI), 4%  
56 paraformaldehyde fix Solution, and 3-(4,5-Dimethylthiazol-2-yl)-2,5-  
57 diphenyltetrazolium bromide (MTT) were purchased from Beyotime Biotechnology  
58 (Shanghai, China).

### 59 **Cell and animals**

60 Human GC cell lines MGC 803 cells and SGC 7901 cells were cultured in RPMI  
61 1640 containing 10% FBS, 100 IU/mL penicillin and 100 µg/mL streptomycin in a  
62 humidified incubator with 5% CO<sub>2</sub> at 37°C.

63 Sprague Dawley (SD) rats (male, 250-320 g, 5-6 weeks) and BALB/c-nu mice  
64 (male, 18-20 g, 4-6 weeks) were purchased from Beijing Vital River Laboratory Animal  
65 Technology CO., Ltd and used under the approval of Animal Care and Use Committee  
66 of Nanjing University of Chinese Medicine.

## 67 **Characterization**

68 The UV spectrum was recorded on a UV-visible spectrophotometer (UV-2450,  
69 Shimadzu, Japan). The  $^1\text{H}$  NMR spectrum was detected by a Bruker (AVANCE)  
70 spectrometer (AV-300, Bruker, USA). High performance liquid chromatography (HPLC)  
71 analyses were performed using a Shimadzu HPLC system consisting of LC-20 binary  
72 pump, SPD-20A UV detector, and an agilenttc-C18 column ( $250 \times 4.6$  mm,  $5 \mu\text{m}$ ).  
73 Methanol/water (55/45, v/v) was used as the mobile phase at  $25^\circ\text{C}$  with a flow rate of  
74  $1.0 \text{ mL/min}$ . The UV detector was set at  $262 \text{ nm}$ . The size, size distribution, and surface  
75 zeta potential of particles in aqueous solution were measured by dynamic light  
76 scattering (DLS) carried out on a Malvern Zetasizer Nano ZS90 (UK). Transmission  
77 electron microscopy (TEM, H-600, Hitachi, Japan) was explored to visualize the size  
78 and shape of micelles.

## 79 **Critical micelle concentration measurement**

80 Nile Red was employed as the fluorescence probe to investigate the critical  
81 micelle concentration (CMC) value of the ORI prodrug. In brief, PEG-*b*-PLL-ss-ORI was  
82 dissolved in phosphate buffered saline (PBS) at concentrations ranging from  $0.01$  to  
83  $1000 \mu\text{g/mL}$ . Then, the Nile Red solution ( $1.0 \text{ mg/mL}$  in DMSO) was added to a final  
84 concentration of  $0.1 \text{ mM}$ . After incubation in the dark at room temperature for  $12 \text{ h}$ ,  
85 the fluorescence intensity of these solutions was recorded on a fluorescence  
86 spectrometer (F-7000, Shimadzu, Japan).

## 87 **Hemolysis study**

88 Freshly drawn mouse blood was diluted in saline. Red blood cells (RBCs) were

89 collected by centrifugation and further diluted by saline. Subsequently, four ORI  
90 micelles solutions in saline with various concentration were mixed with the RBCs  
91 solution and maintained at 37°C for 2 h in a thermotank. After incubation, the mixture  
92 was centrifuged and the supernatant of each sample was collected. The absorbance  
93 of the supernatant was read by a microplate reader at 540 nm. Triton X-100 (10  
94 mg/mL) and saline were employed as positive and negative control, respectively. The  
95 hemolysis ratio (HR) of RBCs was calculated according to the following equation:

$$96 \quad \text{HR\%} = (A_{\text{sample}} - A_{\text{negative}}) / (A_{\text{positive}} - A_{\text{negative}}) \times 100\%$$

97 where, the  $A_{\text{sample}}$ ,  $A_{\text{negative}}$ , and  $A_{\text{positive}}$  indicates the absorbance of sample, negative  
98 control, and positive control, respectively.

99

100

101

102

103

104

105

106

107

108

109

110

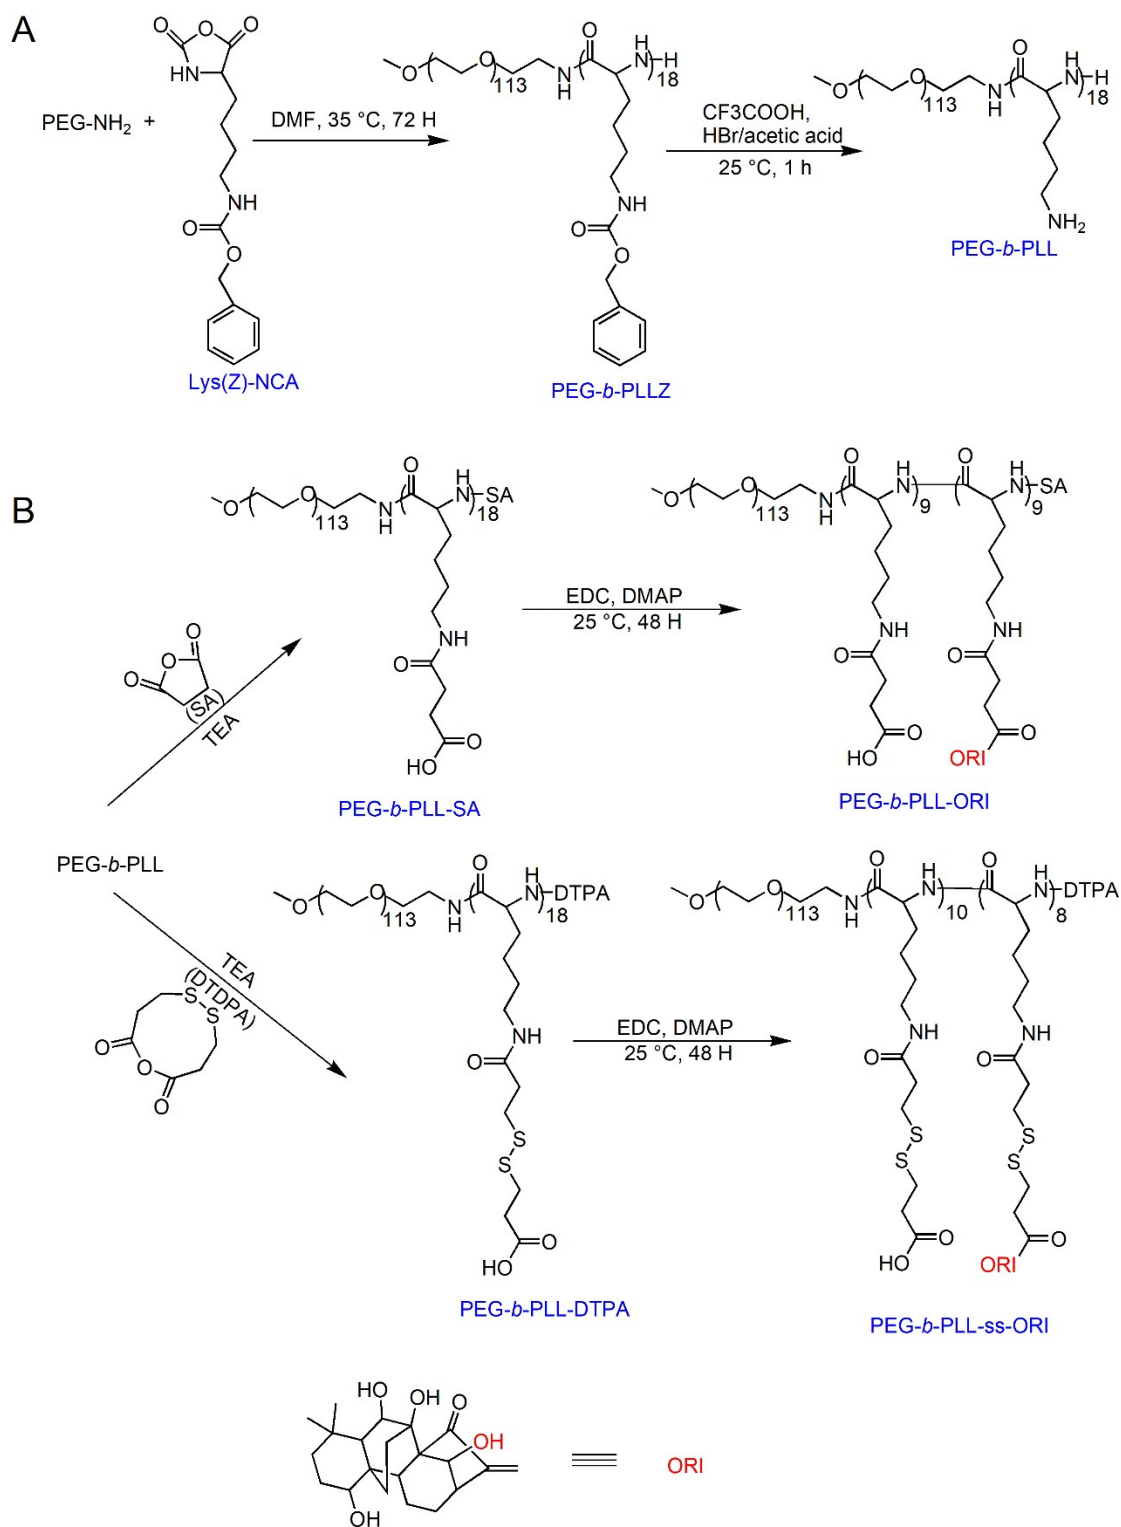

**Fig. S1.** The synthesis route of ORI polymeric prodrug.

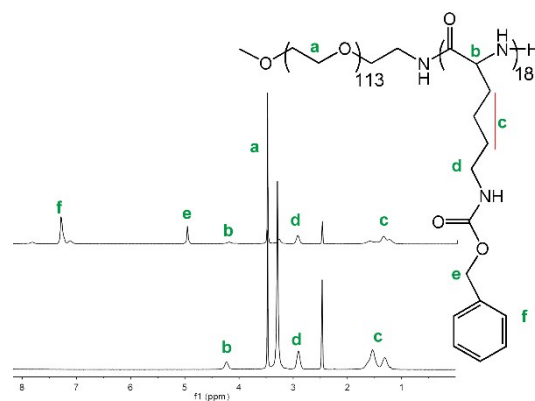

**Fig. S2**  $^1\text{H}$  NMR spectrum of PEG-*b*-PLLZ (above) and PEG-*b*-PLL (below).

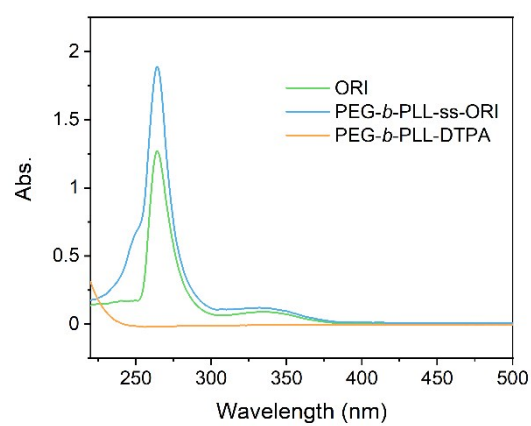

**Fig. S3** UV-visible spectrum of ORI, PEG-*b*-PLL-DTPA, and PEG-*b*-PLL-ss-ORI.

152

153

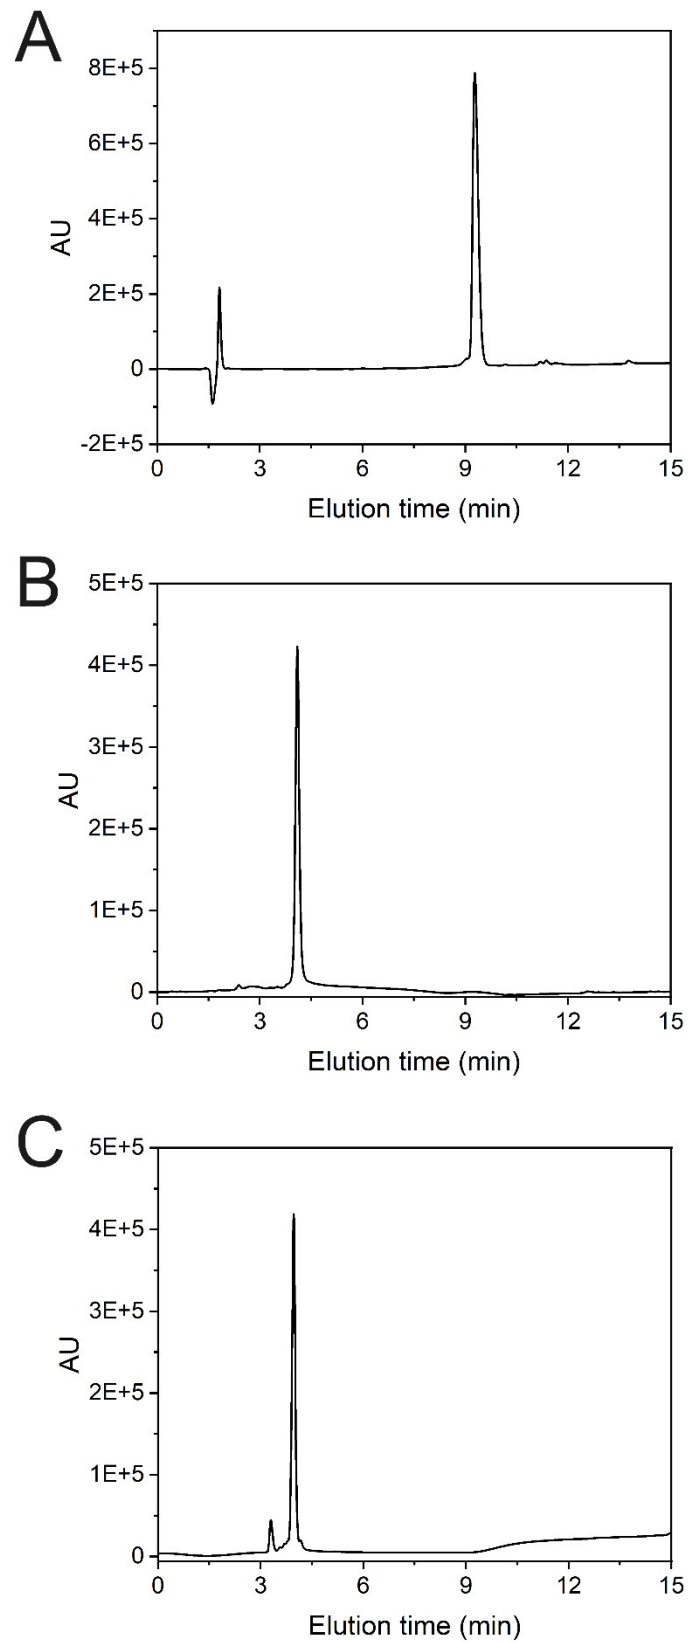

154

155 **Fig. S4** The HPLC measurements of free ORI (A, 0.25 mg/mL), PEG-b-PLL-ss-ORI (B, 1.2 mg/mL), and

156 PEG-b-PLL-ORI (C, 1.2 mg/mL).

157

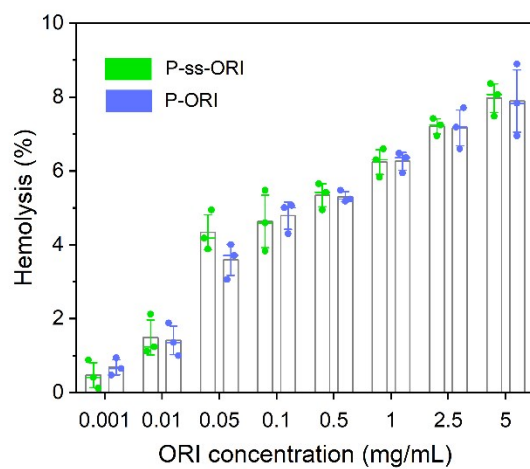

158

159

**Fig. S5** Hemolysis of P-ss-ORI and P-ORI ( $n = 3$ ).

160

161

162

163

164

165

166

167

168

169

170

171

172

173

174

**Table S1.** IC50 value of ORI, P-ORI, and P-ss-ORI against SGC7901 and BGC 823 cells (μg/mL).

| Cells    | ORI  | P-ORI | P-ss-ORI |
|----------|------|-------|----------|
| SGC-7901 | 26.1 | 81.7  | 14.2     |
| BGC 823  | 13.2 | 29.7  | 8.6      |

175

176

177

178

179 **References:**

180 [1] L. Jia, Z. Li, D. Zhang, Q. Zhang, J. Shen, H. Guo, X. Tian, G. Liu, D. Zheng, L. Qi, *Polym. Chem.*  
181 **2013**, 4, 156-165.

182

183

184
